# Supplementary material
Source: publisher site journal article supplement (https://www.spandidos-publications.com/1576/downloadSupplementary)

Figure S1. TBX-3 affects HUVECs through SIRT1-mediated AKT signaling. (A) Western blotting was used to analyze the expression levels of SIRT1, p-AKT and AKT in TBX-3 knockdown HUVECs treated with or without 30 mM glucose. Expression levels of AKT protein were semi-quantified. (B) SIRT1 expression was knocked down in HUVECs by siRNA transfection and TBX-3 was then upregulated in HUVECs by overexpression plasmid transfection. Western blotting was used to analyze the expression levels of TBX-3, p-AKT and AKT was performed in HUVECs treated with 30 mM glucose. Expression levels of AKT protein were semi-quantified. TBX-3, transcription box-3; HUVECs, human umbilical vein endothelial cells; siRNA, small interfering RNA; SIRT1, sirtuin 1; p-, phosphorylated.

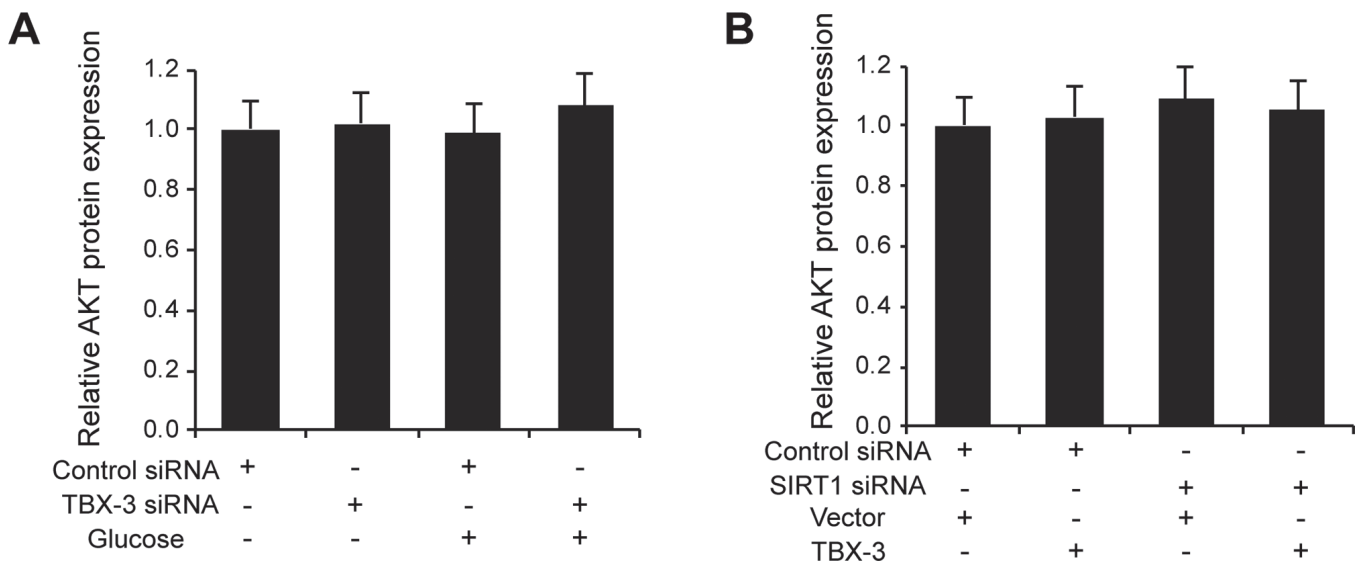

Figure S2. SIRT1 knockdown in HUVECs. Western blotting was used to determine the transfection efficiency of HUVECs transfected with SIRT1 siRNA or control siRNA. SIRT1 protein expression levels were semi-quantified in the right panel. \*\*\* $P < 0.001$  vs. control siRNA. HUVECs, human umbilical vein endothelial cells; siRNA, small interfering RNA; SIRT1, sirtuin 1.

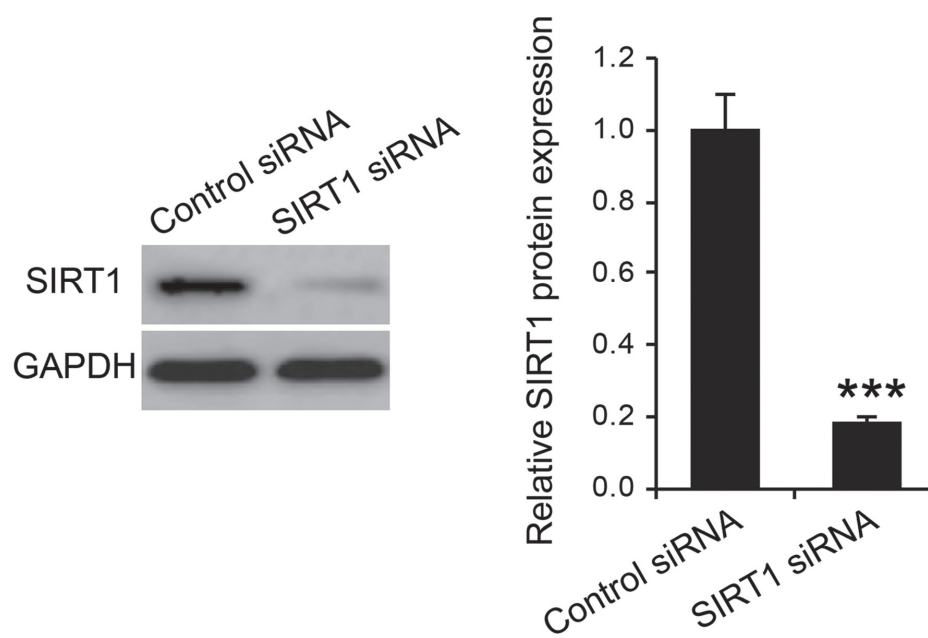

Figure S3. TBX-3 overexpression in HUVECs. Western blotting analysis was used to determine the transfection efficiency of HUVECs transfected with TBX-3 overexpression plasmid or empty vector. TBX-3 protein expression levels were semi-quantified in the right panel. \* $P < 0.05$  vs. vector. TBX-3, transcription box-3; HUVECs, human umbilical vein endothelial cells.

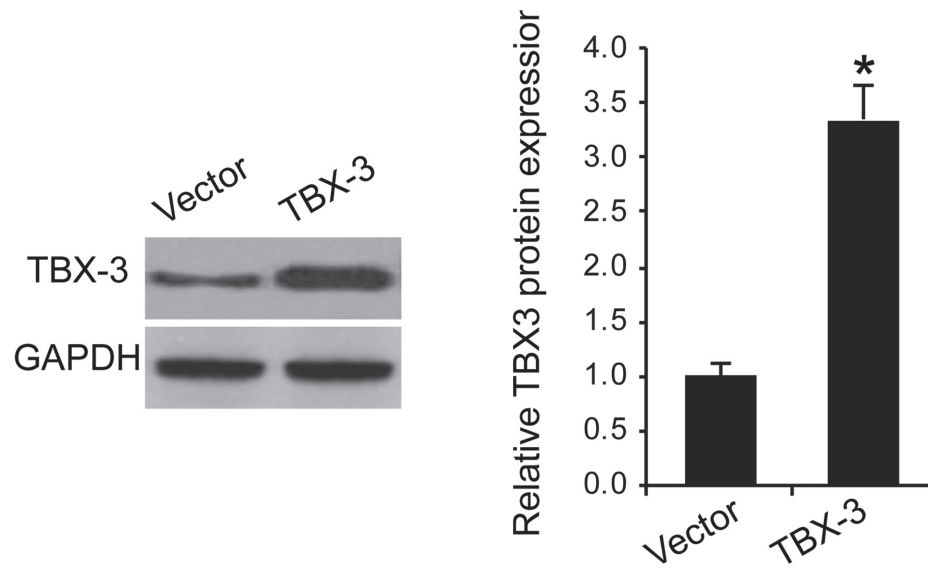

Supplement: Supplementary file [file downloadSupplementary]
